# Supplementary material for: DCE-MRI of locally-advanced carcinoma of the uterine cervix: Tofts analysis versus non-model-based analyses
Source: Springer Nature journal article supplement (doi:10.1186/s13014-020-01526-2), 2020-04-15
Supplement: MOESM1 [file 17898676]

Additional file 1: Figure S1 to:

## DCE-MRI of locally-advanced carcinoma of the uterine cervix: Tofts analysis versus non-model-based analyses

Kjersti V. Lund, Trude G. Simonsen, Gunnar B. Kristensen, Einar K. Rofstad

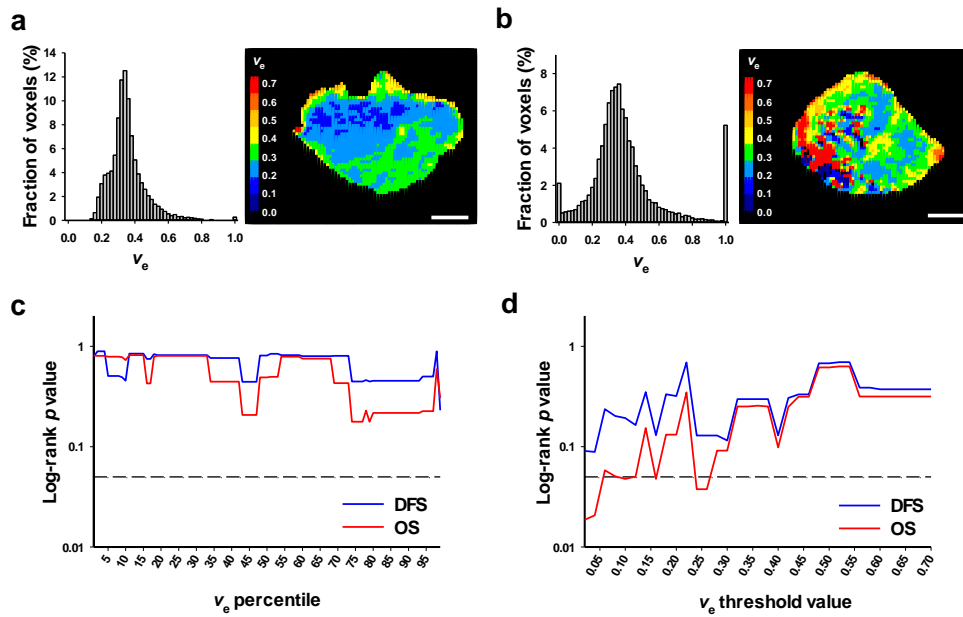

**Additional file 1: Figure S1.** Analysis of  $v_e$  data. Parametric  $v_e$  image and  $v_e$  frequency distribution of a high-enhancing tumor **a** and a low-enhancing tumor **b**, and plots of log-rank  $p$  value versus  $v_e$  percentile **c** and log-rank  $p$  value versus  $v_e$  threshold value **d**. Scale bars: 1 cm.
